19 **Abstract**

20 Comparative studies aid in our understanding of specific conditions favoring the initial evolution  
21 of different types of social behaviors, yet there is much unexplained intraspecific variation in the  
22 expression of social behavior that comparative studies have not yet addressed. The proximate  
23 causes of this individual variation in social behavior within a species have been examined in  
24 some species but its fitness consequences have been less frequently investigated. In this study,  
25 we quantified the fitness consequences of variation in the sociality of prairie voles (*Microtus*  
26 *ochrogaster*). We characterized sociality of voles in semi-natural enclosures using an automated  
27 behavioral tracking system paired with social network analyses to quantify the degree of spatial  
28 and temporal co-occurrence of different voles. We then assessed the relationship between  
29 sociality with mating success (number of different conspecifics with which an individual  
30 produced offspring) and reproductive success (total number of offspring surviving to first  
31 capture). We measured the number of social connections each individual had with all voles and  
32 only with opposite-sex voles by calculating unweighted degree through social network analyses.  
33 Both female and male voles varied in the number of social connections they had with all  
34 conspecifics and with opposite-sex conspecifics. Voles with an intermediate number of social  
35 connections with voles of both sexes had higher mating success overall. In our analyses that  
36 considered all social connections with voles of both sexes, voles with an intermediate number of  
37 social connections produced more offspring. Males with a very high or low number of social  
38 connections also had the lowest average body mass. Overall, our results suggest some limit on  
39 the fitness benefits of sociality. Although there was substantial individual-variation in our  
40 measure of vole social behavior, intermediate levels of social connections may be most  
41 favorable.

42

43 **Keywords**

44 Prairie vole, Social behavior, Social network analyses

## 45 **Introduction**

46           Sociality comes in many forms across a diversity of taxa, ranging from loose, temporary  
47 associations during breeding to long-term group associations whose members exhibit complex  
48 social behaviors such as cooperative hunting or alloparental care. Different forms of sociality are  
49 thought to provide a variety of fitness benefits, including shared resources, reduced predation,  
50 communication, or better access to mates (Eisenberg et al., 1972; Alexander, 1974; van Schaik  
51 1983; Emlen, 1984; Krause and Ruxton, 2002, Silk, 2007). Sociality may also come with costs  
52 associated with group-living, including increased disease transmission (Ewald, 1994; Langwig et  
53 al., 2012; Kappeler et al., 2015), parasite load (Côté, and Poulinb, 1995; Whiteman and Parker,  
54 2004), physiological stress (Creel et al., 2013), reproductive interference by other group  
55 members (Clutton-Brock et al., 1998; Lukas and Huchard, 2014), as well as the time and energy  
56 costs devoted to developing and maintaining social connections that could otherwise be  
57 devoted towards activities directly related to individual survival or reproduction such as foraging  
58 or parental care. Given that these fitness benefits and costs of sociality may vary in direction or  
59 magnitude due to ecological circumstances such as food abundance, weather patterns, or  
60 temporal variability in these factors (Emlen, 1994; Hatchwell and Komdeur, 2000; Shuster and  
61 Wade, 2003; Schradin and Pillay, 2005; Rubenstein and Lovette, 2007; Schradin et al., 2010;  
62 Shen et al., 2017), it is no surprise that there is considerable variation in the presence or  
63 expression of different types of social behaviors among species.

64           Comparative studies have been useful in revealing some of the factors favoring the  
65 evolution of different types of social behaviors. For example, phylogenetic comparative meta-  
66 analyses show that social monogamy is more commonly found in mammalian species that  
67 experience low population densities (Lukas and Clutton-Brock, 2013) and genetic monogamy is  
68 also more common in mammalian species with low population densities as well as those that  
69 exhibit parental care (Lambert et al., 2018). Other comparative studies have shown that  
70 cooperative breeding, where subordinate group members care for offspring produced by

71 dominant breeders, is more likely to be found in mammalian species that live in arid areas  
72 (Faulkes et al., 1997; Lukas and Clutton-Brock, 2017) or in avian species that inhabit areas  
73 where rainfall is low and unpredictable (Jetz and Rubenstein, 2011). While these studies help  
74 illuminate some factors affecting the evolution of social behaviors like social monogamy or  
75 cooperative breeding, they typically cannot address the causes of intraspecific variation in  
76 sociality.

77         Sociality is not always expressed to the same level or in the same way within a species  
78 and there are often a variety of social strategies within the same species (Lott, 1991; Clutton-  
79 Brock, 1989; Getz et al., 1993). The magnitude of variation in the expression of social behavior  
80 within a species may not be as large as that among species but it requires explanation  
81 nonetheless. Although some studies have investigated some of the proximate causes of  
82 individual variation in specific social behaviors such as social monogamy (Young and Wang,  
83 2004; Donaldson and Young, 2008; Ophir et al., 2008; Okhovat et al., 2015; Walum and Young,  
84 2018) or alloparental care (Dantzer et al., 2017), fewer studies document its fitness  
85 consequences. This is not surprising as it requires detailed studies that document the social  
86 behavior of individuals and then relate their degree of sociality to their survival and reproduction.  
87 Most previous studies on this topic have been conducted in primates where investigators  
88 documented how the strength of social relationships (“social bonds”) impacted offspring  
89 survival, mating success, or longevity (e.g., Silk et al., 2003, 2009, 2010; Schülke, et al., 2010).  
90 By investigating the association between social behavior and fitness within a species, we may  
91 be able to understand how individuals balance the tradeoffs between the costs and benefits of  
92 sociality and therefore obtain an even greater understanding of the evolution of sociality.

93         We characterized the variability of social behavior in individual female and male prairie  
94 voles (*Microtus ochrogaster*) and its association with their mating success, reproductive  
95 success, and body condition. Prairie voles are an ideal study system to investigate sociality  
96 because both sexes can exhibit natural variation in sociality by displaying different reproductive

97 strategies (Solomon and Jacquot, 2002). Both females and males can exhibit strategies ranging  
98 from pair bonded “residents”, with an established territory to non-territorial, unpaired  
99 “wanderers” and both are known to switch their strategy over the course of their lifetime (Getz  
100 and Hofmann, 1986; Getz et al., 1993; Solomon and Jacquot, 2002; McGuire and Getz, 2010;  
101 Shuster et al., 2019). Further, genetic monogamy and social monogamy are distinct with some  
102 female-male pairs exhibiting high levels of social and genetic monogamy, some pairs being  
103 socially monogamous but not genetically monogamous, and some individuals exhibiting no  
104 socially or genetically monogamous behavior or mating patterns (Solomon et al., 2004). Thus,  
105 prairie voles may vary in the number and strength of social associations they have with other  
106 individuals. For example, a genetically monogamous female and male likely have a very strong  
107 social association with each other whereas a wandering individual may have many weak  
108 connections with multiple opposite-sex voles. Additionally, voles may vary in the number of  
109 social connections they have with other individuals than their partner because under certain  
110 environmental conditions, such as high population density (Getz et al., 1993; Cochran and  
111 Solomon 2000; Lucia et al. 2008), voles can also form extended family groups when offspring  
112 delay dispersal from the natal nest.

113 We characterized the social behavior of individual prairie voles in semi-natural  
114 enclosures using an automated monitoring system. Prairie voles were all marked uniquely with  
115 passive integrated technology (PIT) tags and their movements were continuously monitored by  
116 an array of radio-frequency identification (RFID) antennas. We used patterns of spatial and  
117 temporal co-occurrence generated from this system with social network analyses to estimate  
118 patterns of social association (unweighted degree). We have previously shown that opposite-  
119 sex voles that exhibit close social associations, as generated by this automated method of data  
120 collection, are also more likely to be caught in the same trap together, exhibit overlapping home  
121 ranges, and show a strong social preference for one another in a choice experiment (Sabol et  
122 al., 2018), suggesting that these measures reflect the strength of social associations. Therefore,

123 we classified individuals with a greater number of social network connections with opposite-sex  
124 or same-sex voles as more social, although we note that the valence of these connections  
125 (agonistic or affiliative) is not known. We characterized the sociality of all  
126 voles throughout the breeding season using social network analyses, recorded their survival  
127 through this period and used parentage analyses to quantify their mating success (number of  
128 different individuals with which they produced offspring) and reproductive success (number of  
129 offspring produced that survived to emergence from the natal nest).

130 We predicted that voles with a greater number of social network connections (i.e., more  
131 social) would have higher mating and reproductive success but lower body condition due to the  
132 trade-offs associated with high levels of this type of sociality. We only investigated body  
133 condition in males because any changes in body mass in females is likely directly related to  
134 pregnancy, We predicted that male voles that were more social (had more social network  
135 connections) would have lower body condition (mass) because polygyny typically involves  
136 energetic costs and risky travel associated with finding female mating partners and interacting  
137 with male competitors, which may therefore reduce survival (Blanckenhorn et al 1995; Armitage  
138 1998).

139

## 140 **Methods**

### 141 *Study site and study animals*

142 All fieldwork was conducted at Miami University's Ecology Research Center in Oxford,  
143 Ohio from May to August 2017. Voles were released into two separate 0.1 ha enclosures (33 m  
144 x 33 m). The 20-gauge sheet metal walls of the enclosures were 75 cm tall and embedded 45  
145 cm into the ground to prevent vole movements among enclosures. Enclosure walls were topped  
146 with an electrified wire to prevent other small to medium sized mammals (e.g. raccoons and  
147 weasels) from entering the enclosures and disturbing traps. Although this system likely  
148 prevented many mammalian predators from entering the enclosures, the enclosures were open

149 and accessible to avian predators and snakes. We had multiple animals that were confirmed to  
150 be depredated by owls and also occasionally saw large snakes within the enclosures. Prior to  
151 releasing prairie voles into the enclosures, we live-trapped within the enclosures for 3  
152 continuous days to capture any small mammals (e.g. *Microtus pennsylvanicus*, *Peromyscus*  
153 *maniculatus*, or *Blarina brevicauda*) and released them outside of the enclosures.

154 We released laboratory-bred 7th and 8th generation prairie voles (descended from voles  
155 originally captured in Illinois) into two enclosures. The pedigree of the laboratory population was  
156 known and to avoid inbreeding, we did not place opposite-sex siblings or parents and their  
157 offspring into the same enclosure. All founding voles were sexually mature (> 31 d, Solomon  
158 1993) but had never bred. Each enclosure was founded with a different density: Enclosure 1  
159 was established by releasing 48 voles (24 females, 24 males) and Enclosure 2 initially  
160 contained 24 voles (12 females, 12 males). These represented densities of 480 voles/ha and  
161 240 voles/ha respectively, which were within the range of vole densities observed in natural  
162 populations (10 to 600 voles/ha: Getz et al., 1994; Getz et al., 2001). The different starting  
163 density was employed to assess the role of density on vole social behavior but, as shown below  
164 (Fig. 1), vole density in Enclosure 1 (high density) decreased over the course of the field  
165 season. Additionally, we do not find or report an effect of density on vole social behavior in this  
166 dataset, only whether there is a difference between the enclosures in general for the whole  
167 season. The vegetation within enclosures consisted primarily of perennial grasses and forbs,  
168 which provided food and cover. Voles were not provided with supplemental food besides the  
169 cracked corn, a low-quality food, used to bait the live-traps.

#### 170 *Recording social behavior of voles*

171 Prior to release into the enclosures, all founding voles were implanted with a PIT tag  
172 (Biomark: Boise, Idaho) with a unique identification number. Once released, we monitored our  
173 populations through a proprietary system of 12 RFID antennas connected to a central recording  
174 station (BioMark RM310/SM303, Boise, ID) that we have used previously to create social

175 networks of prairie voles and infer their social associations (Sabol et al., 2018). These antennas  
176 were placed within the enclosures in two different 3 x 4 arrays (Figure A1) that were rotated  
177 from array 1 to array 2 every 3 days and moved from one enclosure to the other every 6 days  
178 during the 14-week study. The antennas recorded the individual PIT tag numbers of each vole  
179 that passed within 15 cm of the antenna once a second for the entire time the animal was within  
180 this radius of the antenna. When multiple tags were within the 15 cm radius, the system  
181 alternated in recording the tag numbers so that both could be detected. This allowed us to  
182 record the natural movements and social associations of individuals in both populations, which  
183 we have previously shown to be comparable and more detailed than traditional methods of  
184 recording social associations in these populations (Sabol et al., 2018).

#### 185 *Monitoring vole reproduction*

186 We live-trapped both enclosures by placing two Ugglan live- traps (Granhag, Hillerstorp,  
187 Sweden), baited with cracked corn, per grid stake on a 5 x 5 m trapping grid. These live-traps  
188 had a metal cover over the top to shield voles from the elements while in the traps. At the  
189 beginning of the experiment, we live-trapped nearly every day, setting traps in the evening  
190 (2230-2300 h) and checking them approximately two hours later and then leaving them set to be  
191 checked the next morning (0700 h). After the first two weeks of the experiment, we set traps  
192 approximately 3 times per week per enclosure (Monday, Wednesday, and Friday) alternating  
193 between the two enclosures so that voles in each enclosure were trapped three days over the  
194 course of two weeks. Traps were set in the evening (2230-2300 h) and checked the following  
195 morning at 0700 h. If we needed to put radiocollars on voles (see below), we also set traps from  
196 1800-1900 h and then checked them the same evening from 2000-2100 h. Prairie vole gestation  
197 and time to weaning are each approximately 21 days (Richmond & Conaway, 1969) and,  
198 therefore, the offspring produced within the enclosures usually first emerge from the nest  
199 approximately 5-6 weeks after the adults are released (N. Solomon, B. Keane, personal  
200 observations). We therefore stopped setting traps overnight from week 6-14 of the experiment



201 to ensure that offspring would not spend an entire night without their parents. During this time,  
202 we set traps in the evening (2230-2300 h) and checked them approximately two hours later but  
203 did not leave traps set overnight. Finally, we did not trap when there were severe thunderstorms  
204 and made up this trapping session on a different day during the week, if possible. We  
205 supplemented this regular grid trapping by placing additional traps at nest entrances after we  
206 located them using VHF telemetry and/or UV powder tracking (Lemen and Freeman, 1985).

207 During each capture, we identified each individual using a handheld PIT tag reader,  
208 recorded the location where the vole was live-trapped, the other individuals caught in the same  
209 trap, body mass (g, with Pesola spring scale), and assessed reproductive condition. Males were  
210 recorded as being either scrotal or non-scrotal depending on the development of the testes.  
211 Females were recorded as non-reproductive, pregnant, or lactating depending on whether  
212 developing fetuses could be felt or if nipples were pronounced. Once offspring were live trapped  
213 for the first time, we gave them a unique toe clip until they were large enough (>25 g) to be PIT  
214 tagged. Reproductive success of adult voles was estimated as the total number of offspring they  
215 produced that we were able to trap.

#### 216 *Parentage analyses*

217 Before adult voles were released into the enclosures, we collected a small piece of ear  
218 tissue and stored it in 70% ethanol in a -80<sup>0</sup> C freezer. When offspring were trapped for the first  
219 time, the tissue from the identifying toe clip was saved and temporarily stored in a -20<sup>0</sup> C freezer  
220 until samples could be moved to a -80<sup>0</sup> F freezer. We extracted DNA using DNeasy Blood and  
221 Tissue kits (Qiagen). We followed the manufacturer's protocol except that tissue samples were  
222 incubated at 70<sup>0</sup> C, DNA was eluted in 100 µl of molecular grade water instead of 200 µl of buffer  
223 AE, and DNA samples were incubated at room temperature for 5 minutes instead of 1 minute.  
224 Once DNA was extracted, we genotyped the samples for all adults and offspring at seven  
225 microsatellite loci (Keane et al., 2007). We then ran an allele frequency analysis on the population  
226 of voles in each enclosure separately using Cervus 3.0.7 (see Mabry et al., 2011 for full details).

227 To determine parentage, we used Cervus 3.0.7 parentage analyses with known sexes, which  
228 calculates a likelihood ratio for each potential mother and father in order to determine the most  
229 likely biological parents in the population for each offspring (Mabry et al., 2011). We were able to  
230 determine both parents (trio confidence level) with a 95% confidence level for 33/41 (80.5%)  
231 offspring, so only these 33 offspring were included in the analyses of mating and reproductive  
232 success.

### 233 *Ethical Note*

234 All procedures involving live animals were in accordance with the guidelines provided by  
235 the American Society of Mammalogists for the use of wild mammals in research (Sikes et al.,  
236 2016) and were approved by Miami University's Institutional Animal Care and Use Committee  
237 (protocol number 979) as this was where all work with live animals occurred.

### 238 *Statistical Analyses*

239 All statistical analyses were done in R version 3.4.1 (R Core Team, 2017). Figure 1 was  
240 made in R while all other figures were made in ggplot2 version 2.2.1 (Wickham, 2009). All linear  
241 models and generalized linear models were run in R. For all models listed below, we assessed  
242 collinearity among the predictor variables using variance inflation factors (VIFS) in the package  
243 car, version 3.0-0 (Fox and Weisberg, 2011).

### 244 *Density and Body Mass*

245 Population density was calculated based on the number of unique individuals caught  
246 within each two-week period (over each two-week period both enclosures were trapped with  
247 equal effort except for occasional cancellations due to weather). To investigate population  
248 density over the course of the field season, we used a linear model with density (log-  
249 transformed with base 10 to improve normality of residuals) with the fixed effects of enclosure  
250 and weeks in the study and the interaction of these terms. Sex ratio was calculated by dividing  
251 the number of adult males by the number of total adults for each two-week period. We used a  
252 binomial generalized linear model to investigate sex ratio with the fixed effects of enclosure and

253 weeks in the study and the interaction of these terms. VIFs for all non-interaction terms were all  
254 < 3.57.

### 255 *Social Network Analyses*

256 We measured the number of social connections (unweighted degree, hereafter degree)  
257 between same-sex or opposite-sex voles based on co-occurrence data from the RFID  
258 antennas. Individuals with a high degree would have had instances of spatial and temporal co-  
259 occurrence with many other voles whereas those with a low degree had few. We conducted all  
260 social network analyses using the R package *asnipe* version 1.1.4 (Farine, 2017b). In order to  
261 generate our social networks, we took the PIT tag readings from the RFID antennas and ran  
262 them through a Gaussian Mixture Model with each day labeled separately (Psorakis et al.,  
263 2012). This model goes through the raw data of the PIT tag readings and creates groups based  
264 on when tag readings at the same antenna are clumped throughout time. Therefore, there is not  
265 a uniform time period used to create these groups, they are based on how our data were  
266 distributed over time. This model uses clusters of tag readings as “centres of mass” where data  
267 are concentrated and then determines the groups based on the amount and distribution in time  
268 of tag readings in each cluster to determine where to split groups (Psorakis et al., 2012). The  
269 duration of these group events ranged from 0 seconds (so voles were both at the antenna at the  
270 same time) to 66,161 seconds with an average of  $655.2 \pm 3,352.8$  seconds. This then creates a  
271 group by individual matrix where being in the same spatial and temporal “group” counts as an  
272 association between individuals. As we were only interested in the number of connections each  
273 individual had (not the strength of these connections), we used a binary, unweighted  
274 measurement of degree where any non-zero association was counted as a “1”. Thus, anytime  
275 we refer to the number of social connections in this paper, we calculated this using the  
276 unweighted degree. For more details about the construction of the social networks see Sabol et  
277 al. (2018).

### 278 *Reproductive Success Models*

279 For all models including the number of mates (mating success) or the number of  
280 offspring produced that survived to emergence from the natal nest (reproductive success) as the  
281 response variable, we used Poisson generalized linear models. For each response variable we  
282 ran two models using social network data, one including all social connections in order to  
283 investigate sociality overall and one including only the opposite-sex social connections. These  
284 models all had fixed effects of the number of social connections, the interaction of this with sex,  
285 the number of social connections squared to assess non-linear effects of social connections on  
286 mating success or reproductive success (one model including all connections and another for  
287 each response variable including only opposite-sex connections), the interaction of this with sex,  
288 enclosure, and survival (calculated as the proportion of the field season the individual survived  
289 based on last detection). To test if mating success and reproductive success were related, we  
290 ran a separate model with the number of offspring produced as the response variable and fixed  
291 effects of the number of mates with which individuals produced offspring, the interaction of this  
292 with sex, and enclosure. None of the GLMs were over-dispersed as all the dispersion  
293 parameters were  $<1$ , which we tested using R package AER version 1.2.5 (Kleiber and Zeil,  
294 2008). VIFs were all  $< 3.5$  except interaction and squared terms, which were predictably high.

### 295 *Body Mass*

296 To investigate body mass, we calculated the average body mass for each male vole for  
297 the entire field season (range 1-19 measurements, average 7.75 measurements). Females  
298 were not included because we were using body mass as a proxy for body quality, and female  
299 mass would be affected by both pregnancy status and body condition. We then used a general  
300 linear model for average body mass with the number of social connections (one model including  
301 all connections another including only opposite-sex connections), the number of social  
302 connections squared (one model including all connections another including only opposite-sex  
303 connections), enclosure, survival (calculated as the proportion of the field season the individual  
304 survived based on last detection), and the number of mass measurements we had for each

305 individual. We visually assessed the distribution of the data and residuals for normality. VIFs  
306 were all < 2.2 except interaction or squared terms and survival. However, when survival was  
307 excluded from the model, VIFs for all of the other terms were < 3.5 except interactions and  
308 squared terms. Including survival did not alter the statistical significance of any of the results  
309 shown below so we left it in.

### 310 *Randomized Models*

311 For every model that included unweighted degree (the number of social connections),  
312 we used the network permutation method in asnipe (Farine, 2017b). This method is useful  
313 because it helps control for the fact that social network data are not independent. This method  
314 also allows us to investigate our hypotheses more specifically by allowing us to test if the  
315 observed relationships are significantly different from random networks with the same structure  
316 as our social networks (see Farine et al., 2015; Spiegel et al. 2017 for other similar uses of this  
317 method). The network permutation method takes a piece of data from the group by individual  
318 matrix and swaps it for a different individual (Farine, 2013). Specifically, we ran 10,000  
319 randomized models where each time another piece of data from the individual by group matrix  
320 was swapped. We also restricted swaps to only voles in the same enclosure that were recorded  
321 on the RFID antennas during the same day to control for voles that did not survive the entire  
322 season. Further, for the opposite-sex networks we restricted swaps to include only voles of the  
323 same sex so that we were only comparing our opposite-sex network to other opposite-sex  
324 networks, not all possible combinations. We then compared the regression coefficients from the  
325 model for each variable that includes a social network statistic to corresponding b-values from  
326 randomized networks and calculated a new *P*-value based on the number of randomized  
327 models that produced a b-value with a higher absolute value than the absolute value of the  
328 observed model. Therefore, our *P*-value shows us whether the relationship we have observed is  
329 stronger than the relationship from 10,000 randomizations of our dataset (Farine, 2013). We ran  
330 each set of randomizations three times to ensure that the *P*-values were consistently significant

331 in each of the randomizations. We present all three  $P$ -values from these randomizations and,  
332 conservatively, only consider that a relationship is statistically significant if all three  
333 randomizations revealed  $P$ -values  $<0.05$ .

334

## 335 **Results**

### 336 *Enclosure density & adult sex ratio*

337 The number of adult voles in each enclosure declined over the course of the field  
338 season due to mortality (effect of weeks in the study,  $b = -0.14$ ,  $SE = 0.012$ ,  $t_{12} = -11.45$ ,  $P <$   
339  $0.0001$ , Fig. 1a, note estimates on  $\log_{10}$  scale) and the significant interaction between weeks in  
340 the study and enclosure indicated that vole density decreased more strongly in the high density  
341 enclosure than in the low density enclosure (enclosure  $\times$  weeks:  $b = 0.083$ ,  $SE = 0.017$ ,  $t_{12} =$   
342  $4.79$ ,  $P = 0.00045$ ). For example, the starting density of voles in the high-density enclosure was  
343 480 voles/ha (week 0 in Fig. 1a) but was reduced to 200 voles/ha in the middle of the  
344 experiment (week 8 in Fig. 1a) and to 60 voles/ha at the end of the experiment (week 14 in Fig.  
345 1a). The starting density in the low-density enclosure was 240 voles/ha (week 0 in Fig. 1a) but  
346 was reduced to 180 voles/ha in the middle of the experiment (week 8 in Fig. 1a) and 100  
347 voles/ha at the end of the experiment (week 14 in Fig. 1a). In total, only 12.5% of voles in the  
348 high-density enclosure were still alive at the end of the experiment whereas 41.7% of the voles  
349 in the low-density enclosure were still alive at the end of the experiment.

350 Unlike density, adult sex ratio did not differ significantly during the course of the  
351 experiment (effect of time,  $b = -0.04$ ,  $SE = 0.16$ ,  $z = -0.26$ ,  $df = 12$ ,  $P = 0.80$ , Fig. 1b) or between  
352 the two enclosures (effect of enclosure,  $b = 0.15$ ,  $SE = 1.84$ ,  $z = 0.082$ ,  $df = 12$ ,  $P = 0.94$ , Fig.  
353 1b).

### 354 *Effects of sociality on mating success*

355 Overall, both female and male voles that had an intermediate (i.e., the middle of the  
356 range of observed values) number of social connections produced offspring with a greater  
357 number of different mates (i.e., had higher mating success). In the model considering all social  
358 interactions with same- and opposite-sex individuals, voles that had an intermediate number of  
359 social connections (degree) with all possible individuals had higher mating success (effect of  
360 social connections<sup>2</sup>:  $b = -0.012$ ,  $z = -0.88$ ,  $P$ -values from randomized networks = 0.012, 0.0093,  
361  $<0.0001$ , Table 1, Fig. 2a) but this relationship was slightly different between the sexes (sex x  
362 social connections<sup>2</sup>:  $b = 0.014$ ,  $z = 0.94$ ,  $P = 0.010$ , 0.0018,  $<0.0001$ , Table 1, Fig. 2a). In both  
363 females and males, those with an intermediate number of social connections had the highest  
364 mating success, therefore the interaction with sex and the number of social connections<sup>2</sup> on  
365 mating success seemed to be largely due to males having slightly more overall social  
366 connections than females while female mating success peaked at a lower number of social  
367 connections (Fig. 2a). There is also a qualitative difference in the shape of the curve, with  
368 female mating success peaking at a lower number of social connections but then dropping off  
369 more steeply, while male mating success peaked at a higher number of social connections but  
370 declined more gradually (Fig. 2a).

371 The same relationship was true when only opposite-sex connections were considered.  
372 Mating success was highest for female and male voles with an intermediate number of  
373 opposite-sex social connections (social connections<sup>2</sup>:  $b = -0.028$ ,  $z = -1.01$ ,  $P = 0.0011$ , 0.0035,  
374 0.001, Fig. 2b), although the magnitude of this effect slightly differed between the sexes (sex x  
375 social connections<sup>2</sup>:  $b = 0.057$ ,  $z = 1.36$ ,  $P = <0.0001$ ,  $<0.0001$ , 0.0068, Table 1, Fig. 2b). This  
376 latter difference between the sexes seems to be driven by the difference in the number of social  
377 connections between the sexes with females tending to have slightly more social connections  
378 than males.

379 Overall, both female and male voles in the low-density enclosure had higher mating  
380 success than individuals in the higher density enclosure (from model for all social connections:  $b$

381 = 1.89,  $z = 4.55$ ,  $P < 0.0001$ ; from model for all opposite-sex social connections:  $b = 2.03$ ,  $z =$   
382  $4.72$ ,  $P < 0.0001$ , Table 1). Individuals that survived in the enclosures for longer had higher  
383 mating success (all social connections:  $b = 2.07$ ,  $z = 2.33$ ,  $P = 0.020$ ; opposite-sex social  
384 connections:  $b = 1.75$ ,  $z = 2.09$ ,  $P = 0.037$ , Table 1).

### 385 *Effects of sociality on reproductive success*

386 Both female and male voles with an intermediate number of social connections with all  
387 voles produced more offspring that survived to emergence from the natal nest ( $b = -0.0085$ ,  $z =$   
388  $-0.77$ ,  $P = 0.002$ , 0.035, 0.015, Table 2, Fig. 3a). This result did not consistently differ by sex  
389 (sex x social connections<sup>2</sup>:  $b = 0.0082$ ,  $z = 0.63$ ,  $P = 0.021$ , 0.11, 0.022, Table 2, Fig. 3a).  
390 However, when only considering opposite-sex social connections (Fig. 3b), these relationships  
391 were not significant. The number of offspring that voles produced was not related to the number  
392 of opposite-sex social connections for males or females (effect of opposite-sex social  
393 connections:  $b = 0.15$ ,  $z = 0.52$ ,  $P = 0.20$ , 0.53, 0.54, Table 2, Fig. 3b) and voles with an  
394 intermediate number of opposite-sex social connections did not produce significantly more  
395 offspring (effect of opposite-sex social connections<sup>2</sup>:  $b = -0.022$ ,  $z = -0.93$ ,  $P = 0.14$ , 0.099, 0.12,  
396 Table 2, Fig. 3b). This relationship did not consistently vary with sex, as the difference between  
397 the sexes for opposite-sex connections<sup>2</sup> where the inverted u-shaped relationship was slightly  
398 lessened in males and was not significant in all three sets of randomizations (sex x opposite-sex  
399 connections<sup>2</sup>:  $b = 0.038$ ,  $z$ -value = 0.92,  $P = 0.063$ , 0.010, 0.012, Table 2, Fig 3b) and the  
400 difference between opposite sex connections between males and females where males tended  
401 to have fewer connections than females was also not significant in all three sets of  
402 randomizations (sex x number of opposite-sex connections:  $b = -0.39$ ,  $z = -1.04$ ,  $P = 0.047$ ,  
403 0.024, 0.11). Male and female voles that survived for longer produced more offspring (all social  
404 connections:  $b = 2.49$ ,  $z = 3.03$ ,  $P = 0.0025$ ; opposite-sex social connections:  $b = 2.19$ ,  $z = 2.83$ ,  
405  $P = 0.0046$ , Table 2).



406 *Effects of mating tactics on reproductive success*

407 Overall, there was a fitness advantage to being polygynous (mating with a greater  
408 number of individuals) in both females and males. Individuals with more mates produced more  
409 offspring that survived to emergence from the natal nest ( $b = 0.64$ ,  $z = 4.88$ ,  $P < 0.0001$ , Table 3,  
410 Fig. 4) and this relationship did not differ by sex as the interaction between number of mates  
411 and sex was not significant ( $b = -0.093$ ,  $z = -0.56$ ,  $P = 0.58$ , Table 3). Individuals in the lower  
412 density enclosure had higher reproductive success than individuals in the higher density  
413 enclosure ( $b = 1.53$ ,  $z = 3.37$ ,  $P = 0.00076$ , Table 3).

414 *Effects of sociality on body mass*

415 Males with an intermediate number of connections had a higher average body mass  
416 (effect of social connections<sup>2</sup>:  $b = -0.066$ ,  $t = -2.36$ ,  $P = <0.0001$ ,  $<0.0001$ ,  $<0.0001$ , Table 4,  
417 Fig. 5a). This relationship was also significant when only opposite-sex connections were  
418 considered (effect of opposite-sex social connections<sup>2</sup>:  $b = -0.20$ ,  $t = 1.54$ ,  $P = 0.0024$ ,  $0.0031$ ,  
419  $0.0005$ , Table 4, Fig. 5b). Average body mass was not significantly different between the two  
420 enclosures (all social connections:  $b = -1.03$ ,  $t = -0.40$ ,  $P = 0.69$ ; opposite-sex social  
421 connections:  $b = -0.16$ ,  $t = -0.058$ ,  $P = 0.95$ , Table 4). Survival did not predict average body  
422 mass in either model (all social connections:  $b = 13.37$ ,  $t = 1.52$ ,  $P = 0.14$ ; opposite-sex social  
423 connections:  $b = 10.80$ ,  $t = 1.22$ ,  $P = 0.23$ , Table 4). Although the number of measurements we  
424 obtained to calculate each individual's average body mass varied (Fig. 5), it did not affect our  
425 measure of average body mass in either model (all social connections:  $b = -0.12$ ,  $t = -0.20$ ,  $P =$   
426  $0.84$ ; opposite-sex social connections:  $b = -0.20$ ,  $t = -0.31$ ,  $P = 0.76$ , Table 4).

427

428 **Discussion**

429 As expected, both female and male prairie voles varied in the frequency of social  
430 interactions, as reflected in our social network analyses that quantified social network degree

431 using the frequency of temporal and spatial co-occurrence generated by our RFID system.  
432 Female and male voles with an intermediate number of social interactions had the greatest  
433 mating success and produced the greatest number of offspring, though the latter was only the  
434 case when we included all interactions with other voles, and not when only opposite-sex  
435 connections were considered.

436 We tested our predictions about the fitness benefits of sociality using two different sets  
437 of social network data, one including social connections with all voles and one only including  
438 connections with opposite-sex individuals. This allowed us to investigate the potential costs and  
439 benefits of sociality overall (e.g., social interactions of a female vole with other females and  
440 males) as well as specifically social interactions between opposite-sex individuals, which may  
441 be more directly relevant to mating and reproductive success. We found that voles with an  
442 intermediate number of social connections with all voles (i.e., more social) had significantly  
443 higher mating and reproductive success whereas voles with an intermediate number of  
444 opposite-sex connections had significantly higher mating success but not higher reproductive  
445 success. The process of running the randomizations was somewhat different for the two sets of  
446 networks (all social connections or just opposite-sex connections), which could contribute to the  
447 observed differences in the results between the two sets of networks. We limited permutations  
448 for the opposite-sex network to within the same sex (where female social network data were  
449 being swapped for another female and male data were being swapped for another male) so  
450 these swaps could only be done between approximately half as many individuals each time. By  
451 keeping the sex of each individual in the association consistent, the structure of the  
452 randomizations was more like the data it was being compared to instead of comparing all  
453 possible connections (Farine, 2017a). However, since the permutations were done on the raw  
454 data and then we pulled only the opposite-sex connections from these networks, it is possible  
455 that some of the 10,000 permutations affected the same-sex connections in the raw data  
456 (therefore changing a social interaction that is not included in data used for the linear model)

457 and therefore may not have changed the estimate for the relationship between opposite-sex  
458 connections and the response variable every time, whereas in the models with all connections  
459 included, a relevant social interaction would have changed every time, which would then change  
460 the model estimate for the relationship between social connections and the response variable  
461 some amount every time. Since we ran such a large number of these permutations, this may not  
462 have affected the overall result of the tests, but it is a limitation of the method.

463         Using our measure of sociality, our results suggest the possibility of stabilizing selection  
464 on sociality because voles that co-occurred spatially and temporally with very few or very many  
465 conspecifics had the lowest mating success and, at least when considering all social  
466 connections, had the lowest reproductive success. Both McGuire et al. (2002) and Solomon and  
467 Keane (2018) showed that large social groups do not increase female reproductive success.  
468 McGuire et al. (2002) also showed that female prairie voles that lived in large groups had fewer  
469 offspring survive to 12 or 30 days of age. Similarly, Solomon and Keane (2018) showed that  
470 females did not benefit from living in large social groups in two other natural populations. These  
471 studies are consistent with our results that a very large number of social connections (which  
472 should occur in large social groups) does not increase reproductive success of breeding  
473 females, and our results show that this is also true for males.

474         We only recorded the association between one measure of sociality and mating and  
475 reproductive success in one year and the effects of the number of social connections on fitness  
476 could be altered when environmental conditions change. For example, the Female Dispersion  
477 Hypothesis would predict that if our measure of sociality reflects the socially monogamous  
478 behavior of male prairie voles, our measure of sociality should be positively correlated with male  
479 mating success when females are spatially clumped as males that have more social  
480 connections with clumped females should have higher mating success (Shuster and Wade,  
481 2003; Dobson et al., 2010; Lukas and Clutton-Brock, 2013). In natural populations of prairie  
482 voles, density is quite variable across years (Getz et al., 1993, 2001) and some previous

483 observational studies of prairie voles in field settings suggested that socially monogamous  
484 behavior is more common at low densities (McGuire et al., 1990; Solomon et al., 2009; but see  
485 Getz and McGuire, 1993). There is also some evidence that resource distribution may impact the  
486 mating strategy of prairie voles and this effect may be mediated through its influence on density  
487 (Streatfeild et al., 2011). This suggests the possibility that selection on the social behavior of  
488 prairie voles varies among years due to changes in population or female density but additional  
489 multi-year studies measuring a broader array of social behaviors in free-living voles are needed  
490 to test this prediction.

491         One possible explanation for an intermediate level of sociality being associated with the  
492 highest mating success and potentially highest reproductive success is that this reflects a  
493 tradeoff between devoting time to social interactions (although we do not know the type of social  
494 interaction occurring) with other voles and time to other behaviors like foraging and parental  
495 care. Although high levels of sociality can have beneficial effects on individual fitness, it may  
496 also carry costs for an individual's health or physical condition (Nunn et al., 2015). Indeed, we  
497 found that male voles with the most social connections had the lowest body mass, suggesting  
498 that there may be a reduction in body condition associated with a very high level of sociality.  
499 This could reflect the energetic costs associated with having many social connections or living in  
500 a large group (e.g., Lutermann et al., 2013), or these could be agonistic interactions with males  
501 on neighboring territories, resulting in males investing more time in territory defense than males  
502 with fewer neighbors. Why males with very few social connections were also lighter in body  
503 mass is not clear but these males may have been of lower phenotypic quality given that they  
504 had few social connections, low body mass, and low mating and reproductive success.  
505 Alternatively, having fewer social connections could result in a loss of body mass if these males  
506 had no assistance in territory defense and thus, expended more energy than males with more  
507 social connections (e.g., having a female social partner). Females likely face many of these

508 same tradeoffs, but as we did not test quality in females (due to changes in mass being linked to  
509 pregnancy) and so further study is needed to investigate this relationship in females.

510 Our results suggest that it is not advantageous for voles to have social connections with  
511 too many opposite-sex conspecifics. One possible explanation is that individuals with an  
512 intermediate number of social connections may better balance the trade-off between the  
513 number and quality or strength of social relationships. For example, individuals with the highest  
514 social network degree may just have many weak social or agonistic connections, which may not  
515 result in more matings or increased reproductive success. Individuals with an intermediate  
516 social network degree may have more affiliative social connections that are strong enough to  
517 result in matings than voles at either extreme. This also is reflected in the fact that voles have  
518 many more social connections than actual mating partners (Fig. 2), where the range of the  
519 number of mates varies from 0 to 4 while the range of the number of social connections with  
520 opposite-sex individuals is from 0 to 14. This is supported by studies of the association between  
521 the strength of social connections and fitness in cercopithecine primates (baboons) where  
522 females with strong social bonds with other females in their group have higher offspring survival  
523 (Silk et al., 2003, 2009) or longevity (Silk et al., 2010). Similar relationships between the  
524 strength of social bonds and fitness have also been found in male primates; male Assamese  
525 macaques (*Macaca assamensis*) with strong social bonds to other males (including unrelated  
526 males) sired more offspring than those with fewer strong bonds with other males (Schülke, et  
527 al., 2010). As the number of social connections increase, the strength of association of each of  
528 these social connections may decline (Whitehead 2008), thus prairie voles may be constrained  
529 by the number of social connections in which they can invest enough time to result in successful  
530 mating or rearing of offspring given that prairie voles exhibit biparental care. Individuals that can  
531 best balance this trade-off between the number and strength of social connections may have  
532 the highest mating and reproductive success.

533 It is of course likely that the fitness benefits of the quantity versus quality of social  
534 connections may vary according to whether the modal social structure of the species is group-  
535 living (such as primate species mentioned above where strong social bonds increase fitness) or  
536 its mating system. For example, Ryder et al. (2009) found a positive association between the  
537 number of social connections (social network degree) and number of offspring sired in male  
538 manakins. As this is a lekking species, coordinated male displays may make male-male  
539 connections a more important factor for mating success than in prairie voles. Additionally, the  
540 short-term coalitions at leks may make the strength of the relationship less important than in  
541 species like prairie voles. Studies like these are rare and so future studies across a broader  
542 array of species with different mating systems will be needed to fully characterize the  
543 relationship between the number and strength of social connections and measures of fitness.  
544 Doing so will help provide insight into how individuals within a species balance the fitness costs  
545 and benefits of social behavior, thereby providing a complementary approach to comparative  
546 studies regarding the evolution of social behavior.

547

#### 548 **Acknowledgements**

549 We thank the Ecology Research Center (ERC) at Miami University for permitting us to conduct  
550 this study and Jeremy Fruth, field manager at the ERC, for coordinating the project. We also  
551 thank James Lichter, Sage Sparks, Caleb Collins, Tony Leon, Meghan Charles, and Staci  
552 Burrow for assisting on the project. We also thank the American Society of Mammalogists  
553 (Grant-in-Aid of Research to A. Sabol) and University of Michigan (B. Dantzer) for funding.

554

#### 555 **Data Statement**

556 All raw data and R code are available under CC-BY from FigShare at the link  
557 [https://figshare.com/projects/How\\_does\\_individual\\_variation\\_in\\_sociality\\_influence\\_fitness\\_in\\_prairie\\_voles\\_/71969](https://figshare.com/projects/How_does_individual_variation_in_sociality_influence_fitness_in_prairie_voles_/71969).  
558

559 **Literature Cited**

- 560 Alexander, R. D. (1974). The evolution of social behaviour. *Annual Review of Ecology, Evolution,*  
561 *and Systematics*, 5, 325-383.
- 562 Armitage, K. B. (1998). Reproductive strategies of yellow-bellied marmots: Energy conservation  
563 and differences between the sexes. *Journal of Mammalogy*, 79, 385–393.
- 564 Blanckenhorn, W. U., Preziosi, R. F. & Fairbairn, D. J.(1995). Time and energy constraints and  
565 the evolution of sexual size dimorphism — to eat or to mate? *Evolutionary Ecology*, 9, 369-381.  
566 doi:10.1007/BF01237760
- 567 Clutton-Brock, T. H. (1989). Review lecture: mammalian mating systems. *Proceedings of the*  
568 *Royal Society B*, 236, 339-372.
- 569 Clutton-Brock, T.H., Brotherton, P.N.M., Smith, R., McIlrath, G.M., Kansky, R., Gaynor, D., O’rian,  
570 M.J., Skinner, J.D. (1998). Infanticide and expulsion of females in a cooperative mammal.  
571 *Proceedings of the Royal Society B*, 265, 2291-2295.
- 572 Cochran, G. R., & Solomon, N. G. (2000). Effects of food supplementation on the social  
573 organization of prairie voles (*Microtus ochrogaster*). *Journal of Mammalogy*, 81, 746-757.
- 574 Côté, I.M., & Poulinb R. (1995). Parasitism and group size in social animals: a meta-analysis.  
575 *Behavioral Ecology*, 6, 159-165.
- 576 Creel, S., Dantzer, B., Goymann, W. & Rubenstein, D.R. (2013). The ecology of stress: effects of  
577 the social environment. *Functional Ecology*, 27, 66–80.
- 578 Dantzer, B., Goncalves, I.B., Spence-Jones, H.C., Bennett, N.C., Heistermann, M., Ganswindt, A.,  
579 Dubuc, C., Gaynor, D., Manser, M.B., Clutton-Brock, T.H. (2017). The influence of stress  
580 hormones and aggression on cooperative behaviour in subordinate meerkats. *Proceedings of*  
581 *the Royal Society B*, 284, 20171248.
- 582 Dobson, F. S., Way, B. M., & Baudoin C. (2010). Spatial dynamics and the evolution of social  
583 monogamy in mammals. *Behavioral Ecology*, 21, 747–752. doi:10.1093/beheco/arq048

- 584 Donaldson, Z. R., & Young, L. J. (2008). Oxytocin, vasopressin, and the neurogenetics of  
585 sociality. *Science*, 322, 900-904. doi:10.1126/science.1158668
- 586 Eisenberg, J.F., Muckenhirn, N.A., Rudran, R. (1972). The relation between ecology and social  
587 structure in primates. *Science*, 176, 863-874.
- 588 Emlen, S.T. (1984). *Cooperative breeding in birds and mammals. Behavioural Ecology: An*  
589 *Evolutionary Approach*. J.R. Krebs and N.B. Davies (Eds.), pp. 305-339, Blackwell, Oxford.
- 590 Emlen, S.T. (1994). Benefits, constraints and the evolution of the family. *Trends in Ecology and*  
591 *Evolution*, 9, 282-285.
- 592 Ewald, P. W. (1994) *Evolution of Infectious Disease*. Oxford: Oxford University Press.
- 593 Farine, D. R. (2013). Animal social network inference and permutations for ecologists in R using  
594 *asnipe*. *Methods in Ecology and Evolution*, 4, 1187-1194. doi:[10.1111/2041-210X.12121](https://doi.org/10.1111/2041-210X.12121)
- 595 Farine, D. R., Firth, J. A., Aplin, L. M., Crates, R. A., Culina, A., Garroway, C.J., Hinde, C. A.,  
596 Kidd, L. R., Milligan, N. D., Psorakis, I., Radersma, R., Verhelst, B., Voelkl, B., & Sheldon, B. C.  
597 (2015). The role of social and ecological processes in structuring animal populations: a case  
598 study from automated tracking of wild birds. *Royal Society Open Science*, 2.  
599 doi:10.1098/rsos.150057
- 600 Farine, D. R. (2017a). A guide to null models for animal social network analysis. *Methods in*  
601 *Ecology and Evolution*, 8, 1309-1320. doi:[10.1111/2041-210X.12772](https://doi.org/10.1111/2041-210X.12772)
- 602 Farine, D. R. (2017b). *asnipe: Animal Social Network Inference and Permutations for Ecologists*.  
603 R package version 1.1.4. Available online at: <https://CRAN.R-project.org/package=asnipe>
- 604 Faulkes, C. G., Bennett, N. C., Bruford, M. W., O'brien H. P., Aguilar G. H., & Jarvis, J. U. M.  
605 (1997). Ecological constraints drive social evolution in the African mole-rats. *Proceedings of the*  
606 *Royal Society of London B: Biological Sciences*, 267. doi:[10.1098/rspb.1997.0226](https://doi.org/10.1098/rspb.1997.0226)
- 607 Fox, J., & Weisberg, S. (2011). *An {R} Companion to Applied Regression*, Second Edition.  
608 Thousand Oaks CA: Sage. URL: <http://socserv.socsci.mcmaster.ca/jfox/Books/Companion>



- 609 Getz, L. L., & Hofmann, J. E. (1986). Social organization in free-living prairie voles, *Microtus*  
610 *ochrogaster*. *Behavioral Ecology and Sociobiology*, 18, 275-282.
- 611 Getz, L. L., Hofmann, J. E., McGuire, B., & Dolan, T. W. III. (2001). Twenty-five years of  
612 population fluctuations of *Microtus ochrogaster* and *M. pennsylvanicus* in three habitats in east-  
613 central Illinois. *Journal of Mammalogy*, 82, 22–34.
- 614 Getz, L. L., & McGuire, B. (1993). A comparison of living singly and in male-female pairs in the  
615 prairie vole, *Microtus ochrogaster*. *Ethology*, 94, 265-278. doi:[10.1111/j.1439-](https://doi.org/10.1111/j.1439-0310.1993.tb00444.x)  
616 [0310.1993.tb00444.x](https://doi.org/10.1111/j.1439-0310.1993.tb00444.x)
- 617 Getz, L. L., McGuire, B., Pizzuto, T., Hofmann, J. E., & Frase, B. (1993). Social organization of  
618 the prairie vole (*Microtus ochrogaster*). *Journal of Mammalogy*. 74, 44–58. doi:  
619 [10.2307/1381904](https://doi.org/10.2307/1381904)
- 620 Getz, L. L., McGuire, B., Hofmann, J., Pizzuto, T., & Frase, B. (1994). Natal dispersal and  
621 philopatry in prairie voles (*Microtus ochrogaster*): settlement, survival, and potential reproductive  
622 success. *Ethology Ecology & Evolution*, 6, 267-284.
- 623 Hatchwell, B. J., & Komdeur, J. (2000). Ecological constraints, life history traits and the evolution  
624 of cooperative breeding. *Animal Behaviour*, 59, 1079–1086. doi:[10.1006/anbe.2000.1394](https://doi.org/10.1006/anbe.2000.1394)
- 625 Jetz, W., & Rubenstein, D. R. (2011). Environmental uncertainty and the global biogeography of  
626 cooperative breeding in birds. *Current Biology*, 21, 72-78. doi:[10.1016/j.cub.2010.11.075](https://doi.org/10.1016/j.cub.2010.11.075).
- 627 Kappeler, P. M., Cremer, S., & Nunn, C. L. (2015). Sociality and health: impacts of sociality on  
628 disease susceptibility and transmission in animal and human societies. *Philosophical*  
629 *Transactions of the Royal Society B: Biological Sciences*, 370. doi:[10.1098/rstb.2014.0116](https://doi.org/10.1098/rstb.2014.0116)
- 630 Keane, B., Bryant, L., Goyal, U., Williams, S., Kortering, S. L., Lucia, K. E., Richmond, A. R., &  
631 Solomon, N. G. (2007). No effect of body condition at weaning on survival and reproduction in  
632 prairie voles. *Canadian Journal of Zoology*, 85, 718-727.

- 633 Kleiber, C., & Zeileis, A. (2008). *Applied econometrics with R*. New York: Springer-Verlag. ISBN  
634 978-0-387-77316-2. <https://CRAN.R-project.org/package=AER>" [https://CRAN.R-](https://CRAN.R-project.org/package=AER)  
635 [project.org/package=AER](https://CRAN.R-project.org/package=AER)
- 636 Krause, J., & Ruxton, G. D. (2002). *Living in groups*. Oxford: Oxford University Press.
- 637 Lambert, C. T., Sabol, A. C., & Solomon, N. G. (2018). Genetic monogamy in socially  
638 monogamous mammals is primarily predicted by multiple life history factors: a meta-analysis.  
639 *Frontiers in Ecology and Evolution*, 6, 139. doi:10.3389/fevo.2018.00139
- 640 Langwig, K. E., Frick, W. F., Bried, J. T., Hicks, A. C., Kunz, T. H. & Marm Kilpatrick, A. (2012),  
641 Sociality, density-dependence and microclimates determine the persistence of populations  
642 suffering from a novel fungal disease, white-nose syndrome. *Ecology Letters*, 15: 1050-1057.  
643 doi:10.1111/j.1461-0248.2012.01829.x
- 644 Lemen, C. A., & Freeman, P. W. (1985). Tracking mammals with fluorescent pigments: a new  
645 technique. *Journal of Mammalogy*, 66, 134–136.
- 646 Lott, D. F. (1991). *Intraspecific variation in the social systems of wild vertebrates*. Cambridge:  
647 Cambridge University Press.
- 648 Lucia, K. E., Keane, B., Hayes, L. D., Lin, Y. K., Schaefer, R. L., & Solomon, N. G. (2008).  
649 Philopatry in prairie voles: an evaluation of the habitat saturation hypothesis. *Behavioral*.  
650 *Ecology*, 19, 774–783. doi: 10.1093/beheco/arn028
- 651 Lukas, D., & Clutton-Brock, T. H. (2013). The evolution of social monogamy in mammals.  
652 *Science*, 341, 526 -530. doi:10.1126/science.1238677
- 653 Lukas, D., & Clutton-Brock, T. H. (2017). Climate and the distribution of cooperative breeding in  
654 mammals. *Royal Society Open Science*, 4. doi:[10.1098/rsos.160897](https://doi.org/10.1098/rsos.160897)
- 655 Lukas, D., & Huchard, E. (2014). The evolution of infanticide by males in mammalian societies.  
656 *Science*, 346, 841-844. doi:[0.1126/science.1257226](https://doi.org/10.1126/science.1257226)

- 657 Lutermann, H., Bennett, N. C., Speakman, J. R., & Scantlebury, M. (2013). Energetic benefits of  
658 sociality offset the costs of parasitism in a cooperative mammal. *PLOS ONE*, 8, e57969.  
659 doi:10.1371/journal.pone.0057969
- 660 Mabry, K. E., Streatfeild, C. A., Keane, B., & Solomon, N. G. (2011). avpr1a length polymorphism  
661 is not associated with either social or genetic monogamy in free-living prairie voles. *Animal*  
662 *Behaviour*, 81, 11-18.
- 663 McGuire, B., & Getz, L.L. (2010). Alternative male reproductive tactics in a natural population of  
664 prairie voles, *Microtus ochrogaster*. *Acta Theriol*, 55, 261-270. doi:10.4098/j.at.0001-  
665 7051.077.2009
- 666 McGuire, B., Getz, L. L., & Oli, M. K. (2002). Fitness consequences of sociality in prairie voles,  
667 *Microtus ochrogaster*: influence of group size and composition. *Animal Behaviour*, 64, 645-654.  
668 doi:10.1006/anbe.2002.3094.
- 669 McGuire, B., Pizzuto, T., Getz, L.L. (1990). Potential for social interaction in a natural population  
670 of prairie voles (*Microtus ochrogaster*). *Canadian Journal of Zoology*, 68, 391-398.
- 671 Nunn, C.L., Jordán, F., McCabe, C.M., Verdolin, J.L., Fewell, J.H. (2015). Infectious disease and  
672 group size: more than just a numbers game. *Philosophical Transactions of the Royal Society B*,  
673 370, 20140111.
- 674 Okhovat, M., Berrio, A., Wallace, G., Ophir, A. G., & Phelps, S. M. (2015). Sexual fidelity trade-  
675 offs promote regulatory variation in the prairie vole brain. *Science*, 350, 1371-1374.
- 676 Ophir, A.G., Wolff, J.O., Phelps, S.M. (2008). Variation in neural V1aR predicts sexual fidelity and  
677 space use among male prairie voles in semi-natural settings. *PNAS*, 105, 1249-1254.
- 678 Psorakis, I., Roberts, S. J., Rezek, I., & Sheldon, B. C. (2012). Inferring social network structure in  
679 ecological systems from spatio-temporal data streams. *Journal of the Royal Society Interface*, 9,  
680 3055–3066. doi: 10.1098/rsif.2012.0223
- 681 R Core Team (2017). *R: A Language and Environment for Statistical Computing*. Vienna: R  
682 Foundation for Statistical Computing. Available online at: <https://www.R-project.org/>.

- 683 Richmond, M., & Conaway, C. H. (1969). Management, breeding, and reproductive performance  
684 of the vole, *Microtus ochrogaster*, in a laboratory colony. *Laboratory Animal Care*, 19, 80-87.
- 685 Rubenstein, D. R., & Lovette, I. J. (2007) Temporal environmental variability drives the evolution  
686 of cooperative breeding in birds. *Current Biology*, 17, 1414-1419.  
687 doi:10.1016/j.cub.2007.07.032.
- 688 Ryder, T.B., Parker, P.G., Blake, J.G., & Loiselle, B.A. (2009). It takes two to tango: reproductive  
689 skew and social correlates of male mating success in a lek-breeding bird.  
690 *Proceedings of the Royal Society B: Biological Sciences*, 276, 2377-2384.  
691 [doi:10.1098/rspb.2009.0208](https://doi.org/10.1098/rspb.2009.0208)
- 692 Sabol, A. C., Solomon, N. G., & Dantzer, B. (2018). How to study socially monogamous behavior  
693 in secretive animals? Using social network analyses and automated tracking systems to study  
694 the social behavior of prairie voles. *Frontiers in Ecology and Evolution*, 6, 178.  
695 doi:10.3389/fevo.2018.00178
- 696 Schradin, C., & Pillay, N. (2005). Intraspecific variation in the spatial and social organization of the  
697 African striped mouse, *Journal of Mammalogy*, 86, 99–107.
- 698 Schradin, C., König, B., Pillay, N. (2010). Reproductive competition favours solitary living while  
699 ecological constraints impose group-living in African striped mice. *Journal of Animal Ecology*,  
700 73, 515-521.
- 701 Schülke, O., Bhagavatula, J., Vigilant, L., & Ostner, J. (2010). Social bonds enhance reproductive  
702 success in male macaques. *Current Biology*, 20, 2207-2210.  
703 doi:10.1016/j.cub.2010.10.058.
- 704 Shen, S-F., Emlen, S.T., Koenig, W.D., Rubenstein, D.R. (2017). The ecology of cooperative  
705 breeding behaviour. *Ecology Letters*, 20, 708-720.
- 706 Shuster, S. M., & Wade, M. J. (2003). *Mating systems and mating strategies*. Princeton: Princeton  
707 University Press.

- 708 Shuster, S. M., Willen, R. M., Keane, B., & Solomon, N. G. (2019). Alternative mating tactics in  
709 socially monogamous prairie voles, *Microtus ochrogaster*. *Frontiers in Ecology and Evolution*, 7.  
710 doi:10.3389/fevo.2019.00007
- 711 Sikes, R. S., Bryan, J. A., Byman, D., Danielson, B. J., Eggleston, J., Gannon, M. R., Gannon, W.  
712 L., Hale, D. W., Jesmer, B. R., Odell, D. K., Olson, L. E., Stevens, R. D., Thompson, T. A.,  
713 Timm, R. M., Trehwitt, S. A., & Willoughby, J. R. (2016). 2016 Guidelines of the American  
714 Society of Mammalogists for the use of wild mammals in research and education. *Journal of*  
715 *Mammalogy* 97, 663–688.
- 716 Silk, J. B. (2007). The adaptive value of sociality in mammalian groups. *Philosophical*  
717 *Transactions of the Royal Society B: Biological Sciences*, 362, 539–559.  
718 doi:[10.1098/rstb.2006.1994](https://doi.org/10.1098/rstb.2006.1994)
- 719 Silk, J. B., Alberts, S. C., & Altmann, J. (2003). Social bonds of female baboons enhance infant  
720 survival. *Science*, 302, 1231-1234. doi:10.1126/science.1088580
- 721 Silk, J.B., Beehner, J.C., Bergman, T.J., Crockford, C., Engh, A.L., Moscovice, L.R., Wittig, R.M.,  
722 Seyfarth, R.M., Cheney, D.L. (2009). The benefits of social capital: close social bonds among  
723 female baboons enhance offspring survival. *Proceedings of the Royal Society B*, 276, 3099-  
724 3104.
- 725 Silk, J.B., Beehner, J.C., Bergman, T.J., Crockford, C., Engh, A.L., Moscovice, L.R., Wittig, R.M.,  
726 Seyfarth, R.M., Cheney, D.L. (2010). Strong and consistent social bonds enhance the longevity  
727 of female baboons. *Current Biology*, 20, 1359-1361.
- 728 Solomon, N. G. (1993). Comparison of parental behavior in male and female prairie voles  
729 (*Microtus ochrogaster*). *Canadian Journal of Zoology*, 71, 1991–1994.
- 730 Solomon, N. G., & Keane, B. (2018). Dispatches from the field: sociality and reproductive success  
731 in prairie voles. *Animal Behaviour*, 143, 193–203. doi:10.1016/j.anbehav.2018.07.001
- 732 Solomon, N. G., & Jacquot, J. J. (2002). Characteristics of resident and wandering prairie voles,  
733 *Microtus ochrogaster*. *Canadian Journal of Zoology*, 80, 951-955.

- 734 Solomon, N. G., Keane, B., Knoch, L. R., & Hogan, P. J. (2004). Multiple paternity in socially  
735 monogamous prairie voles (*Microtus ochrogaster*). *Canadian Journal of Zoology*, *82*, 1667–  
736 1671.
- 737 Solomon, N.G., Richmond, A. R., Harding, P. A., Fries, A., Jacquemin, S., Schaefer, R. L., Lucia,  
738 K. E., & Keane, B. (2009). Polymorphism at the *avpr1a* locus in male prairie voles correlated  
739 with genetic but not social monogamy in field populations. *Molecular Ecology*, *18*, 4680-4695.
- 740 Spiegel, O., Sih, A., Leu, S. T., & Bull, C. M. (2017). Where should we meet? Mapping social  
741 network interactions of sleepy lizards shows sex-dependent social network structure. *Animal*  
742 *Behaviour*, *136*, 207-215. doi:10.1016/j.anbehav.2017.11.001.
- 743 Streatfeild, C. A., Mabry, K. E., Keane, B., Crist, T. O., & Solomon, N. G. (2011). Intraspecific  
744 variability in the social and genetic mating systems of prairie voles, *Microtus ochrogaster*.  
745 *Animal Behaviour*, *82*, 1387–1398. doi: 10.1016/j.anbehav.2011.09.023
- 746 van Schaik, C. (1983). Why are diurnal primates living in groups? *Behaviour*, *87*, 120-144.
- 747 Walum, H., & Young, L. J. (2018). The neural mechanisms and circuitry of the pair bond. *Nature*  
748 *Reviews Neuroscience*, *19*, 643–654. doi:10.1038/s41583-018-0072-6
- 749 Whitehead, H. (2008). *Analyzing animal societies: quantitative methods for vertebrate social*  
750 *analysis*. Chicago: University of Chicago Press.
- 751 Whiteman, N. K., & Parker, P. G. (2004). Effects of host sociality on ectoparasite population  
752 biology. *Journal of Parasitology*, *90*, 939-947. doi:[10.1645/GE-310R](https://doi.org/10.1645/GE-310R)
- 753 [Wickham, H. \(2009\). Ggplot2: Elegant graphics for data analysis. New York: Springer-Verlag](#)
- 754 Young, L. J., & Wang, Z. (2004). The neurobiology of pair bonding. *Nature Neuroscience*, *7*,  
755 1048–1054. doi:10.1038/nn1327
- 756
- 757
- 758
- 759

760 **Table 1.** Effects of the number of social connections on vole mating success (number of  
761 different individuals a vole produced offspring with).

| Social Network                  | Variable                            | Estimate      | SE           | z-value      | P-value from GLM  | P-values from Randomization Tests     |
|---------------------------------|-------------------------------------|---------------|--------------|--------------|-------------------|---------------------------------------|
| <b>All individuals</b>          | <b>Intercept</b>                    | <b>-2.66</b>  | <b>0.65</b>  | <b>-4.06</b> | <b>&lt;0.0001</b> | NA                                    |
|                                 | Sex (M)                             | 0.68          | 0.92         | 0.73         | 0.46              | NA                                    |
|                                 | <b>Enclosure (LD)</b>               | <b>1.89</b>   | <b>0.41</b>  | <b>4.55</b>  | <b>&lt;0.0001</b> | NA                                    |
|                                 | <b>Survival</b>                     | <b>2.07</b>   | <b>0.89</b>  | <b>2.33</b>  | <b>0.020</b>      | NA                                    |
|                                 | Degree                              | 0.083         | 0.21         | 0.40         | 0.69              | 0.12, 0.0098, 0.14                    |
|                                 | <b>Degree<sup>2</sup></b>           | <b>-0.012</b> | <b>0.013</b> | <b>-0.88</b> | <b>0.38</b>       | <b>0.012, 0.0093, &lt;0.0001</b>      |
|                                 | <b>Sex (M) x Degree</b>             | <b>-0.21</b>  | <b>0.23</b>  | <b>-0.90</b> | <b>0.37</b>       | <b>0.021, 0.0017, &lt;0.0001</b>      |
|                                 | <b>Sex (M) x Degree<sup>2</sup></b> | <b>0.014</b>  | <b>0.015</b> | <b>0.94</b>  | <b>0.35</b>       | <b>0.01, 0.0018, &lt;0.0001</b>       |
| <b>Opposite-sex individuals</b> | <b>Intercept</b>                    | <b>-2.81</b>  | <b>0.70</b>  | <b>-4.08</b> | <b>&lt;0.0001</b> | NA                                    |
|                                 | Sex (M)                             | 0.78          | 0.91         | 0.86         | 0.39              | NA                                    |
|                                 | <b>Enclosure (LD)</b>               | <b>2.03</b>   | <b>0.43</b>  | <b>4.72</b>  | <b>&lt;0.0001</b> | NA                                    |
|                                 | <b>Survival</b>                     | <b>1.75</b>   | <b>0.84</b>  | <b>2.09</b>  | <b>0.037</b>      | NA                                    |
|                                 | Degree                              | 0.19          | 0.31         | 0.63         | 0.53              | 0.18, 0.19, <0.0001                   |
|                                 | <b>Degree<sup>2</sup></b>           | <b>-0.028</b> | <b>0.028</b> | <b>-1.01</b> | <b>0.31</b>       | <b>0.0011, 0.0035, 0.001</b>          |
|                                 | <b>Sex (M) x Degree</b>             | <b>-0.53</b>  | <b>0.38</b>  | <b>-1.42</b> | <b>0.15</b>       | <b>&lt;0.0001, &lt;0.0001, 0.0046</b> |
|                                 | <b>Sex (M) x Degree<sup>2</sup></b> | <b>0.057</b>  | <b>0.042</b> | <b>1.36</b>  | <b>0.17</b>       | <b>&lt;0.0001, &lt;0.0001, 0.0068</b> |

762 Degree refers to the number of social connections for each individual either with all voles or  
763 opposite-sex voles. Note that relationships involving social network data have three *P*-values  
764 because those regression coefficients were compared to those from randomized networks three  
765 times to determine if they were consistently significant (see methods for details). Survival refers to  
766 the proportion of days the vole was in the enclosure based on when it was last recorded. “LD” is  
767 low-density enclosure.

768

769 **Table 2.** Effects of the number of social connections on vole reproductive success (number of  
770 offspring produced that survived until emergence from the natal nest).

| Social Network                  | Variable                      | Estimate       | SE           | z-value      | P-value from GLM  | P-values from Randomization Tests |
|---------------------------------|-------------------------------|----------------|--------------|--------------|-------------------|-----------------------------------|
| <b>All individuals</b>          | <b>Intercept</b>              | <b>-2.90</b>   | <b>0.66</b>  | <b>-4.14</b> | <b>&lt;0.0001</b> | NA                                |
|                                 | Sex (M)                       | 0.61           | 0.93         | 0.65         | 0.52              | NA                                |
|                                 | <b>Enclosure (LD)</b>         | <b>2.10</b>    | <b>0.40</b>  | <b>5.24</b>  | <b>&lt;0.0001</b> | NA                                |
|                                 | <b>Survival</b>               | <b>2.49</b>    | <b>0.82</b>  | <b>3.03</b>  | <b>0.0025</b>     | NA                                |
|                                 | Degree                        | 0.053          | 0.19         | 0.28         | 0.78              | 0.33, 0.25, 0.19                  |
|                                 | <b>Degree<sup>2</sup></b>     | <b>-0.0085</b> | <b>0.011</b> | <b>-0.77</b> | <b>0.44</b>       | <b>0.002, 0.035, 0.015</b>        |
|                                 | Sex (M) x Degree              | -0.14          | 0.21         | -0.64        | 0.52              | 0.12, 0.18, 0.12                  |
|                                 | Sex (M) x Degree <sup>2</sup> | 0.0082         | 0.013        | 0.63         | 0.53              | 0.021, 0.11, 0.022                |
| <b>Opposite-sex individuals</b> | <b>Intercept</b>              | <b>-2.97</b>   | <b>0.67</b>  | <b>-4.41</b> | <b>&lt;0.0001</b> | NA                                |
|                                 | Sex (M)                       | 0.58           | 0.91         | 0.64         | 0.53              | NA                                |
|                                 | <b>Enclosure (LD)</b>         | <b>2.21</b>    | <b>0.41</b>  | <b>5.40</b>  | <b>&lt;0.0001</b> | NA                                |
|                                 | <b>Survival</b>               | <b>2.19</b>    | <b>0.77</b>  | <b>2.83</b>  | <b>0.0046</b>     | NA                                |
|                                 | Degree                        | 0.15           | 0.28         | 0.52         | 0.60              | 0.20, 0.53, 0.54                  |
|                                 | Degree <sup>2</sup>           | -0.022         | 0.024        | -0.93        | 0.35              | 0.14, 0.099, 0.12                 |
|                                 | Sex (M) x Degree              | -0.39          | 0.38         | -1.04        | 0.30              | 0.047, 0.024, 0.11                |
|                                 | Sex (M) x Degree <sup>2</sup> | 0.038          | 0.041        | 0.92         | 0.36              | 0.063, 0.010, 0.02                |

771 Degree refers to the number of social connections for each individual either with all voles or  
772 opposite-sex voles. Note that relationships involving social network data have three *P*-values  
773 because those regression coefficients were compared to those from randomized networks three  
774 times to determine if they were consistently significant (see methods for details). Survival refers  
775 to the proportion of days the vole was in the enclosure based on when it was last recorded. “LD”  
776 is low-density enclosure.



777 **Table 3.** Overall effects of vole mating success (number of different individuals with which a  
778 vole produced offspring) on reproductive success (number of offspring produced that survived  
779 until emergence from the natal nest).

| Variable               | Estimate     | SE          | z-value      | P-value from GLM  |
|------------------------|--------------|-------------|--------------|-------------------|
| <b>Intercept</b>       | <b>-2.13</b> | <b>0.44</b> | <b>-4.83</b> | <b>&lt;0.0001</b> |
| <b>Number of Mates</b> | <b>0.64</b>  | <b>0.13</b> | <b>4.88</b>  | <b>&lt;0.0001</b> |
| Sex (M)                | 0.26         | 0.49        | 0.53         | 0.60              |
| <b>Enclosure (LD)</b>  | <b>1.53</b>  | <b>0.45</b> | <b>3.37</b>  | <b>0.00076</b>    |
| # of Mates x Sex (M)   | -0.093       | 0.17        | -0.56        | 0.58              |

780 Since this model did not include social network data we did not perform the randomizations to  
781 generate three *P*-values, we present the *P*-values from the GLM. “LD” is low-density enclosure.

782

783 **Table 4.** Effects of the number of social connections on average body mass for males.

| Social Network                  | Variable                  | Estimate      | SE           | t-value      | P-value from LM   | P-values from Randomization Tests         |
|---------------------------------|---------------------------|---------------|--------------|--------------|-------------------|-------------------------------------------|
| <b>All individuals</b>          | <b>Intercept</b>          | <b>43.42</b>  | <b>2.70</b>  | <b>16.10</b> | <b>&lt;0.0001</b> | NA                                        |
|                                 | Enclosure (LD)            | -1.03         | 2.57         | -0.40        | 0.69              | NA                                        |
|                                 | Survival                  | 13.37         | 8.78         | 1.52         | 0.14              | NA                                        |
|                                 | # of measures             | -0.12         | 0.60         | -0.20        | 0.84              | NA                                        |
|                                 | <b>Degree</b>             | <b>0.95</b>   | <b>0.56</b>  | <b>1.70</b>  | <b>0.099</b>      | <b>&lt;0.0001, 0.0001, &lt;0.0001</b>     |
|                                 | <b>Degree<sup>2</sup></b> | <b>-0.066</b> | <b>0.028</b> | <b>-2.36</b> | <b>0.025</b>      | <b>&lt;0.0001, &lt;0.0001, &lt;0.0001</b> |
| <b>Opposite-sex individuals</b> | <b>Intercept</b>          | <b>44.31</b>  | <b>2.81</b>  | <b>15.78</b> | <b>&lt;0.0001</b> | NA                                        |
|                                 | Enclosure (LD)            | -0.16         | 2.80         | -0.058       | 0.95              | NA                                        |
|                                 | Survival                  | 10.80         | 8.89         | 1.22         | 0.23              | NA                                        |
|                                 | # of measures             | -0.20         | 0.63         | -0.31        | 0.76              | NA                                        |
|                                 | <b>Degree</b>             | <b>1.54</b>   | <b>1.22</b>  | <b>1.26</b>  | <b>0.22</b>       | <b>0.0035, 0.0036, 0.0332</b>             |
|                                 | <b>Degree<sup>2</sup></b> | <b>-0.20</b>  | <b>0.13</b>  | <b>-1.54</b> | <b>0.13</b>       | <b>0.0024, 0.0031, 0.0005</b>             |

784 Degree refers to the number of social connections for each individual either with all voles or  
785 opposite-sex voles. Relationships involving social network data have three *P*-values because  
786 those regression coefficients were compared to those from randomized networks three times to  
787 determine if they were consistently significant (see methods). “# of measures” refers to number  
788 of times we measured body mass, which were used to generate average mass for each  
789 individual. Survival refers to proportion of days the vole was in the enclosure. “LD” is low-density  
790 enclosure.

791

792

793

794

795

796 **Figure 1.** a) The number of females, males, and offspring in each of our two enclosures over  
797 time during the study based on the number of unique individuals live-trapped during each two-  
798 week period of the field season. Note that the area of enclosures is equal, so the number of  
799 voles in each enclosure can be used to compare relative density between the two, b) The sex  
800 ratio in each enclosure, calculated as the proportion of total adult voles trapped during each  
801 two-week period of the field season that were males, over time of the study.

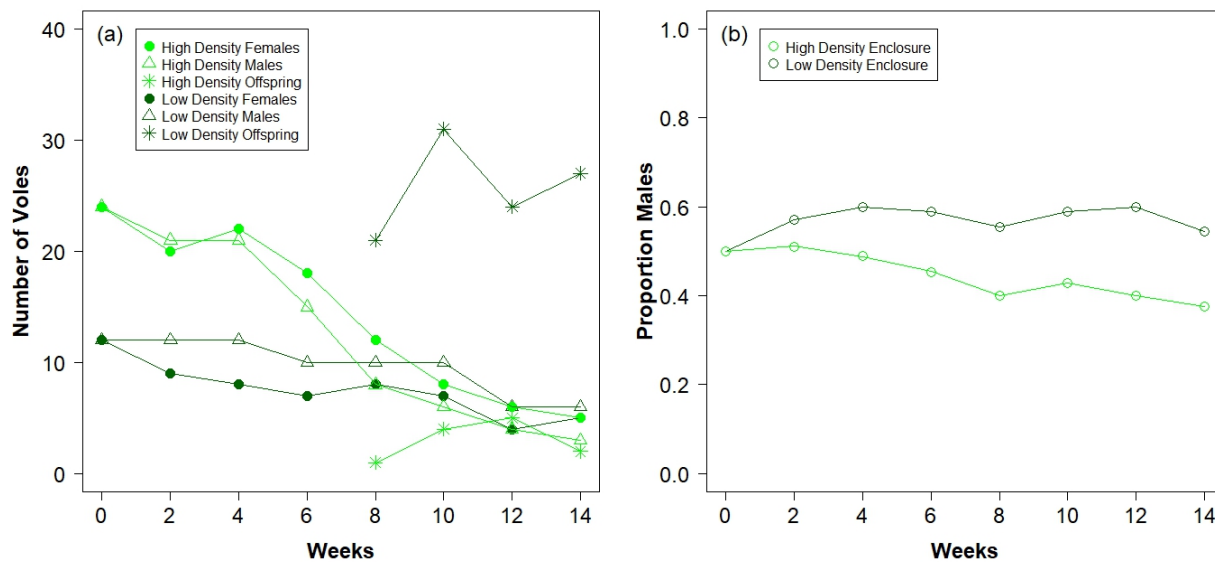

802

803



811 **Figure 3.** a) Both females and males with an intermediate number of social connections with all  
812 voles in their enclosure (both same- and opposite-sex individuals) produced more offspring that  
813 survived to emergence from the natal nest. b) Female and male voles with an intermediate  
814 number of social connections with only opposite-sex individuals in their enclosure also tended to  
815 produce more offspring. Points are jittered with red points being females and blue points being  
816 males. Full statistical results shown in Table 2.

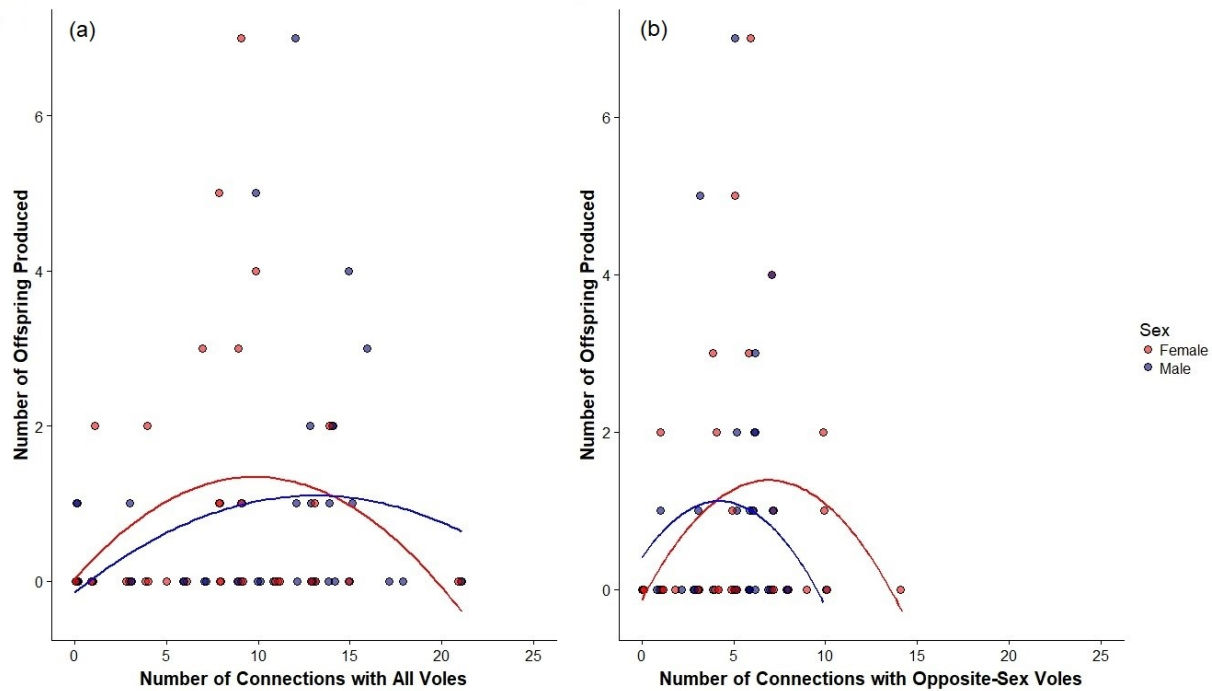

817

818



825 **Figure 5.** Male voles with an intermediate number of social connections a) with both female and  
826 male voles in their enclosure or b) with just female voles, were significantly heavier over the  
827 course of this study. Body mass for males was averaged for the entire duration of this study.  
828 The number of times we measured body mass (“N”) varied among males so the size of each  
829 point is scaled based on the number of recorded mass measurements we have for each  
830 individual. Full results shown in Table 4.

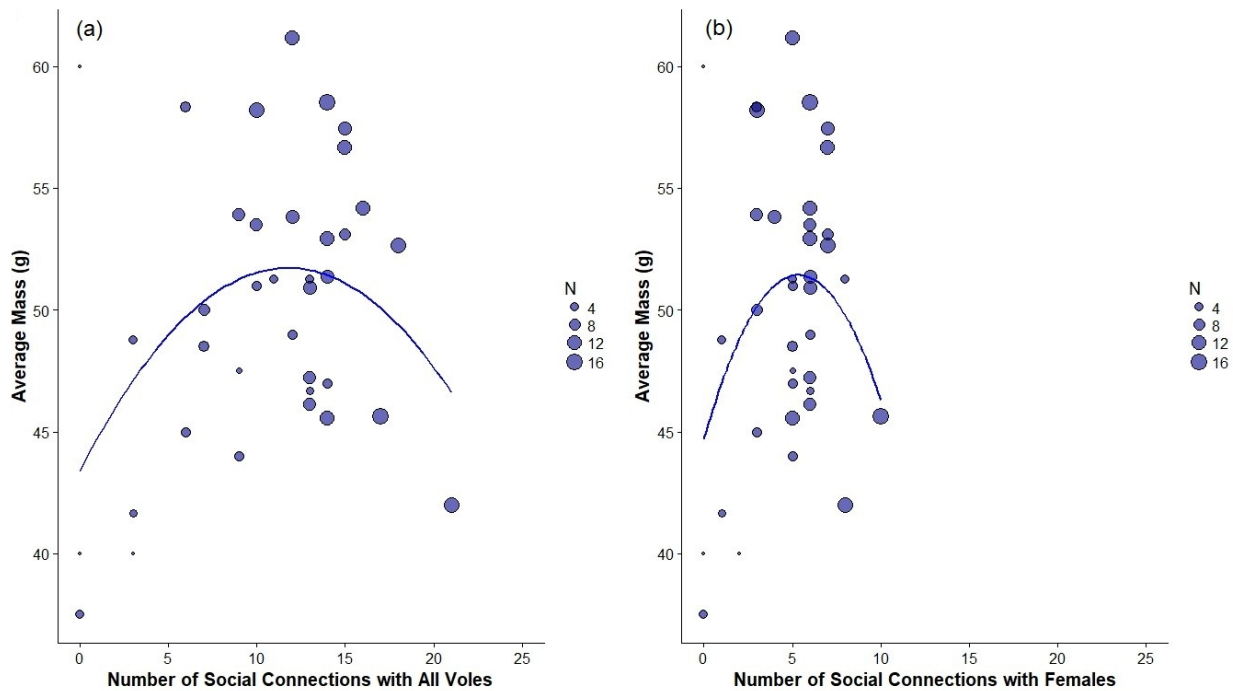

831

832

833 **Figure A1.** Layout of the two RFID arrays in the enclosures. The RFID system was kept at each  
834 array in each enclosure for three days in the order: array 1 enclosure 1, array 2 enclosure 1,  
835 array 1 enclosure 2, and array 2 enclosure 2 and then repeated for the duration of the field  
836 season.

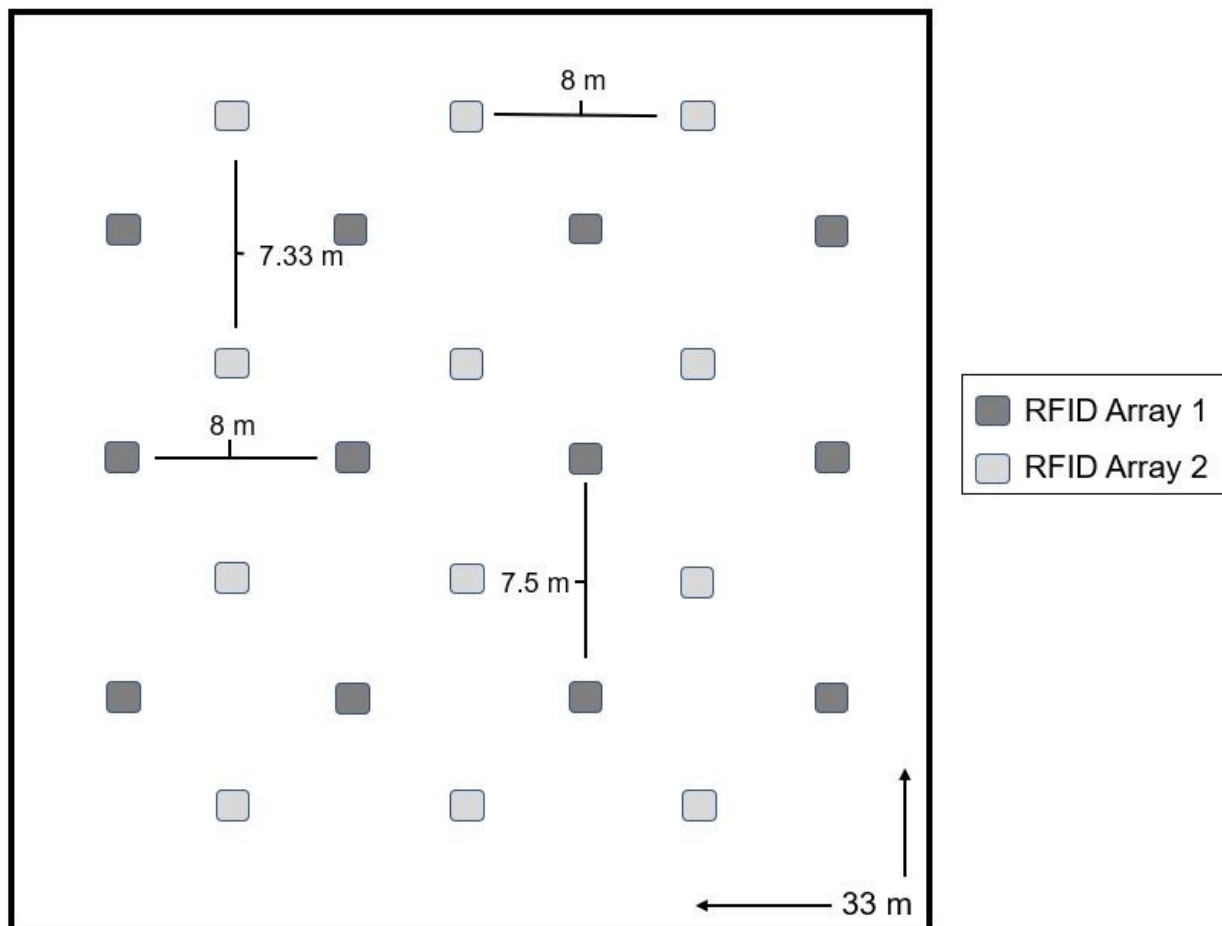

837
